# Supplementary material for: Improved HSC reconstitution and protection from inflammatory stress and chemotherapy in mice lacking granzyme B
Source: PubMed Central journal article supplement — J Exp Med. 2014 May 5;211(5):769–79. doi: 10.1084/jem.20131072 (PMC4010905; doi:10.1084/jem.20131072), 2014-05-05
Supplement: supp_jem.20131072_JEM_20131072_sm.pdf [file supp_jem.20131072_JEM_20131072_sm.pdf]

SUPPLEMENTAL MATERIAL

Carnevali et al., <http://www.jem.org/cgi/content/full/jem.20131072/DC1>

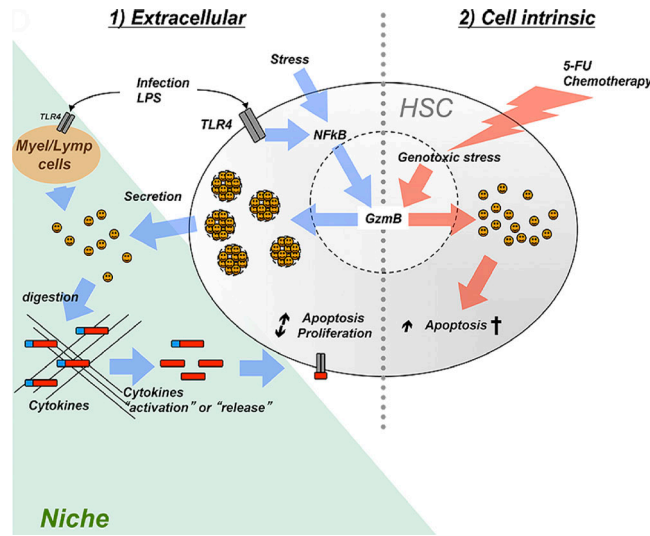

Figure S1. Model depicting GzmB function in HSCs in response to stress. See last paragraph of Results and discussion.

Table S1. Cell surface marker phenotypes

| Population name   | Cell surface phenotype                                                                                                                             |
|-------------------|----------------------------------------------------------------------------------------------------------------------------------------------------|
| LSK               | Lin <sup>-</sup> Sca1 <sup>+</sup> c-Kit <sup>+</sup>                                                                                              |
| HSCs              | LSK CD150 <sup>+</sup> CD48 <sup>-</sup> CD34 <sup>-</sup>                                                                                         |
| MPP1              | LSK CD150 <sup>+</sup> CD48 <sup>-</sup> CD34 <sup>+</sup>                                                                                         |
| LSK SLAM          | Lin <sup>-</sup> Sca1 <sup>+</sup> CD150 <sup>+</sup> CD48 <sup>-</sup>                                                                            |
| MEPs              | Lin <sup>-</sup> Sca1 <sup>-</sup> CD117 <sup>+</sup> CD34 <sup>-</sup> FcRγ <sup>-</sup>                                                          |
| GMPs              | Lin <sup>-</sup> Sca1 <sup>-</sup> CD117 <sup>+</sup> CD34 <sup>+</sup> FcRγ <sup>+</sup>                                                          |
| CMPs              | Lin <sup>-</sup> Sca1 <sup>-</sup> CD117 <sup>+</sup> CD34 <sup>+</sup> FcRγ <sup>-</sup>                                                          |
| CLPs              | Lin <sup>-</sup> Sca1 <sup>low</sup> CD117 <sup>low</sup> CD127 <sup>+</sup> CD135 <sup>+</sup>                                                    |
| Lin <sup>-</sup>  | Gr1 <sup>-</sup> CD11b <sup>-</sup> B220 <sup>-</sup> CD4 <sup>-</sup> CD8 <sup>-</sup> Ter119 <sup>-</sup> Dx5 <sup>-</sup><br>NK1.1 <sup>-</sup> |
| Granulocytes      | Gr1 <sup>+</sup> CD11b <sup>+</sup>                                                                                                                |
| Megakaryocytes    | CD41 <sup>+</sup>                                                                                                                                  |
| B cells           | B220 <sup>+</sup>                                                                                                                                  |
| T cells           | CD4 <sup>+</sup> or CD8 <sup>+</sup>                                                                                                               |
| Erythroblasts     | Ter119 <sup>+</sup>                                                                                                                                |
| Endothelial cells | CD45 <sup>-</sup> Ter119 <sup>-</sup> CD31 <sup>+</sup>                                                                                            |
| MSCs              | CD45 <sup>-</sup> Ter119 <sup>-</sup> Sca1 <sup>+</sup> PDGFRα <sup>+</sup> CD51 <sup>-</sup>                                                      |
| Osteoblasts       | CD45 <sup>-</sup> Ter119 <sup>-</sup> Sca1 <sup>-</sup> CD51 <sup>+</sup>                                                                          |

CLP, common lymphoid progenitor; CMP, common myeloid progenitor; GMP, granulocyte macrophage progenitor; MEP, megakaryocyte-erythroid progenitor cell; MSC, mesenchymal stromal cell.
